# Supplementary material for: Rationale and Design of Khuzestan Vitamin D Deficiency Screening Program in Pregnancy: A Stratified Randomized Vitamin D Supplementation Controlled Trial
Source: PubMed Central journal article supplement (PMC5400884; doi:10.2196/resprot.7159), 2017-04-07
Supplement: resprot_v6i4e54_app4.pdf [file resprot_v6i4e54_app4.pdf]

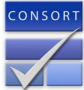

## CONSORT 2010 checklist of information to include when reporting a randomised trial\*

**Title:** Khuzestan vitamin D deficiency screening program in pregnancy: a stratified randomized vitamin D supplementation controlled trial;  
Rationale and Design

| Section/Topic             | Item No | Checklist item                                                                                                                        | Reported on page No   |
|---------------------------|---------|---------------------------------------------------------------------------------------------------------------------------------------|-----------------------|
| <b>Title and abstract</b> |         |                                                                                                                                       |                       |
|                           | 1a      | Identification as a randomised trial in the title                                                                                     | <u>P.1</u>            |
|                           | 1b      | Structured summary of trial design, methods, results, and conclusions (for specific guidance see CONSORT for abstracts)               | <u>P.2</u>            |
| <b>Introduction</b>       |         |                                                                                                                                       |                       |
| Background and objectives | 2a      | Scientific background and explanation of rationale                                                                                    | <u>PP.4 and 5</u>     |
|                           | 2b      | Specific objectives or hypotheses                                                                                                     | <u>P.5</u>            |
| <b>Methods</b>            |         |                                                                                                                                       |                       |
| Trial design              | 3a      | Description of trial design (such as parallel, factorial) including allocation ratio                                                  | <u>P.7,9,13</u>       |
|                           | 3b      | Important changes to methods after trial commencement (such as eligibility criteria), with reasons                                    | <u>Not applicable</u> |
| Participants              | 4a      | Eligibility criteria for participants                                                                                                 | <u>P.11</u>           |
|                           | 4b      | Settings and locations where the data were collected                                                                                  | <u>PP. 7 and 11</u>   |
| Interventions             | 5       | The interventions for each group with sufficient details to allow replication, including how and when they were actually administered | <u>PP. 14 and 15</u>  |
| Outcomes                  | 6a      | Completely defined pre-specified primary and secondary outcome measures, including how and when they were assessed                    | <u>PP. 16, 17</u>     |
|                           | 6b      | Any changes to trial outcomes after the trial commenced, with reasons                                                                 | <u>Not applicable</u> |
| Sample size               | 7a      | How sample size was determined                                                                                                        | <u>PP. 12, 13</u>     |

7b Not applicable

When applicable, explanation of any interim analyses and stopping guidelines

Randomisation:

|                                  |     |                                                                                     |       |
|----------------------------------|-----|-------------------------------------------------------------------------------------|-------|
| Sequence generation              | 8a  | Method used to generate the random allocation sequence                              | P. 13 |
| Implementation                   | 8b  | Type of randomisation; details of any restriction (such as blocking and block size) | P.13  |
| Allocation concealment mechanism | 10  | P.13                                                                                |       |
|                                  | Who | generated the random allocation sequence                                            |       |

ence  
,  
who  
enrol  
led  
parti  
cipa  
nts,  
and  
who  
assi  
gned  
parti  
cipa  
nts  
to  
inter  
venti  
ons

---

|                    |                                                      |                                                                                                                                          |                       |
|--------------------|------------------------------------------------------|------------------------------------------------------------------------------------------------------------------------------------------|-----------------------|
| Blinding           | 11a                                                  | If done, who was blinded after assignment to interventions (for example, participants, care providers, those assessing outcomes) and how | <u>P.13</u>           |
|                    | 11b                                                  | If relevant, description of the similarity of interventions                                                                              | <u>Not applicable</u> |
|                    | 12a                                                  | Statistical methods used to compare groups for primary and secondary outcomes                                                            | <u>PP.15</u>          |
|                    | 12b                                                  | Methods for additional analyses, such as subgroup analyses and adjusted analyses                                                         | <u>Not applicable</u> |
| Not applicable yet | Participant flow (a diagram is strongly recommended) |                                                                                                                                          |                       |
|                    | 13b                                                  | For each group, losses and exclusions after randomisation, together with reasons                                                         | <u>PP. 9, 10</u>      |

|                                                                                         |                                                                                                                                                |     |                                                                                                                                                   |                       |
|-----------------------------------------------------------------------------------------|------------------------------------------------------------------------------------------------------------------------------------------------|-----|---------------------------------------------------------------------------------------------------------------------------------------------------|-----------------------|
| 13a                                                                                     | For each group, the numbers of participants who were randomly assigned, received intended treatment, and were analysed for the primary outcome | 14a | Dates defining the periods of recruitment and follow-up                                                                                           | Not applicable yet    |
|                                                                                         |                                                                                                                                                | 14b | Why the trial ended or was stopped                                                                                                                | Not applicable yet    |
|                                                                                         |                                                                                                                                                | 15  | A table showing baseline demographic and clinical characteristics for each group                                                                  | PP. 18-20             |
| Numbers analysed                                                                        |                                                                                                                                                | 16  | For each group, number of participants (denominator) included in each analysis and whether the analysis was by original assigned groups           | Not applicable yet    |
| Outcomes and estimation                                                                 |                                                                                                                                                | 17a | For each primary and secondary outcome, results for each group, and the estimated effect size and its precision (such as 95% confidence interval) | Not applicable<br>Yet |
|                                                                                         |                                                                                                                                                | 17b | For binary outcomes, presentation of both absolute and relative effect sizes is recommended                                                       | Not applicable<br>Yet |
|                                                                                         |                                                                                                                                                | 18  | Results of any other analyses performed, including subgroup analyses and adjusted analyses, distinguishing pre-specified from exploratory         | Not applicable<br>yet |
| Harms                                                                                   |                                                                                                                                                | 19  | All important harms or unintended effects in each group (for specific guidance see CONSORT for harms)                                             | Not applicable<br>yet |
| <b>Discussion</b>                                                                       |                                                                                                                                                |     |                                                                                                                                                   |                       |
| P.15                                                                                    | Limitations                                                                                                                                    |     |                                                                                                                                                   |                       |
| Generalisability                                                                        | 20                                                                                                                                             | 21  | Generalisability (external validity, applicability) of the trial findings                                                                         | Not applicable        |
| Trial limitations, addressing sources of potential bias, imprecision, and, if relevant, |                                                                                                                                                |     |                                                                                                                                                   |                       |

|                                                             |    |                                                                                                               |                    |
|-------------------------------------------------------------|----|---------------------------------------------------------------------------------------------------------------|--------------------|
| multiplicity of analyses                                    |    |                                                                                                               |                    |
| Interpretation                                              | 22 | Interpretation consistent with results, balancing benefits and harms, and considering other relevant evidence | Not applicable yet |
| <b>Other information</b>                                    |    |                                                                                                               |                    |
| Registration                                                |    |                                                                                                               | 23                 |
| Protocol REGISTRATION NUMBER AND NAME OF TRIAL REGISTRY P.3 | 24 | Where the full trial protocol can be accessed, if available                                                   | Not available yet  |
| Funding                                                     | 25 | Sources of funding and other support (such as supply of drugs), role of funders                               | P.22               |

\*We strongly recommend reading this statement in conjunction with the CONSORT 2010 Explanation and Elaboration for important clarifications on all the items. If relevant, we also recommend reading CONSORT extensions for cluster randomised trials, non-inferiority and equivalence trials, non-pharmacological treatments, herbal interventions, and pragmatic trials. Additional extensions are forthcoming; for those and for up to date references relevant to this checklist, see [www.consort-statement.org](http://www.consort-statement.org).
